# Supplementary material
Source: PubMed Central journal article supplement (PMC8390906)

**Biophysical Journal, Volume 120**

**Supplemental information**

**Neuropilin-1 assists SARS-CoV-2 infection by stimulating the separation of Spike protein S1 and S2**

**Zhen-lu Li and Matthias Buck**

**Biophysical Journal, Volume 120**

**Supplemental information**

**Neuropilin-1 assists SARS-CoV-2 infection by stimulating the separation of Spike protein S1 and S2**

**Zhen-lu Li and Matthias Buck**

# Supplemental Information: Neuropilin-1 Assists SARS-CoV-2 Infection by Stimulating the Separation of Spike Protein Domains S1 and S2

Li Zhen-lu <sup>1</sup> and Buck Matthias <sup>1-4\*</sup>

<sup>1</sup>Department of Physiology and Biophysics, Case Western Reserve University, School of Medicine, 10900 Euclid Avenue, Cleveland, Ohio 44106, U. S. A. <sup>2</sup>Department of Pharmacology; <sup>3</sup>Department of Neurosciences and <sup>4</sup>Case Comprehensive Cancer Center, Case Western Reserve University, School of Medicine, 10900 Euclid Avenue, Cleveland, Ohio 44106, U. S. A.

Corresponding authors: M.Buck ([matthias.buck@case.edu](mailto:matthias.buck@case.edu))

Table S1: Simulation Systems.

| Models             | Simulated systems                        | Methods                                 | Atomic number                 | Simulation time |
|--------------------|------------------------------------------|-----------------------------------------|-------------------------------|-----------------|
| Model 1 to model 7 | Spike protein; Nrp1 a2-b1-b2             | Explicit solvent model; conventional MD | ~530,000 atoms (with solvent) | 20 ns           |
| Model 1 to model 7 | Spike protein; ACE2; one Nrp1 a2-b1-b2   | Implicit solvent model; Steered MD      | 71,386 atoms                  | 20 ns           |
| Model 1            | Spike protein; ACE2; three Nrp1 a2-b1-b2 | Implicit solvent model; Steered MD      | 85,206 atoms                  | 20 ns           |

Figure S1: Instances of excluded models. a) Clash with Spike trimer – most of the Nrp1 would be buried on top of S2; b) no extra space for a1 domain addition; c) merge of similar models; d) models that place b2 domain too far (distal) from the membrane.

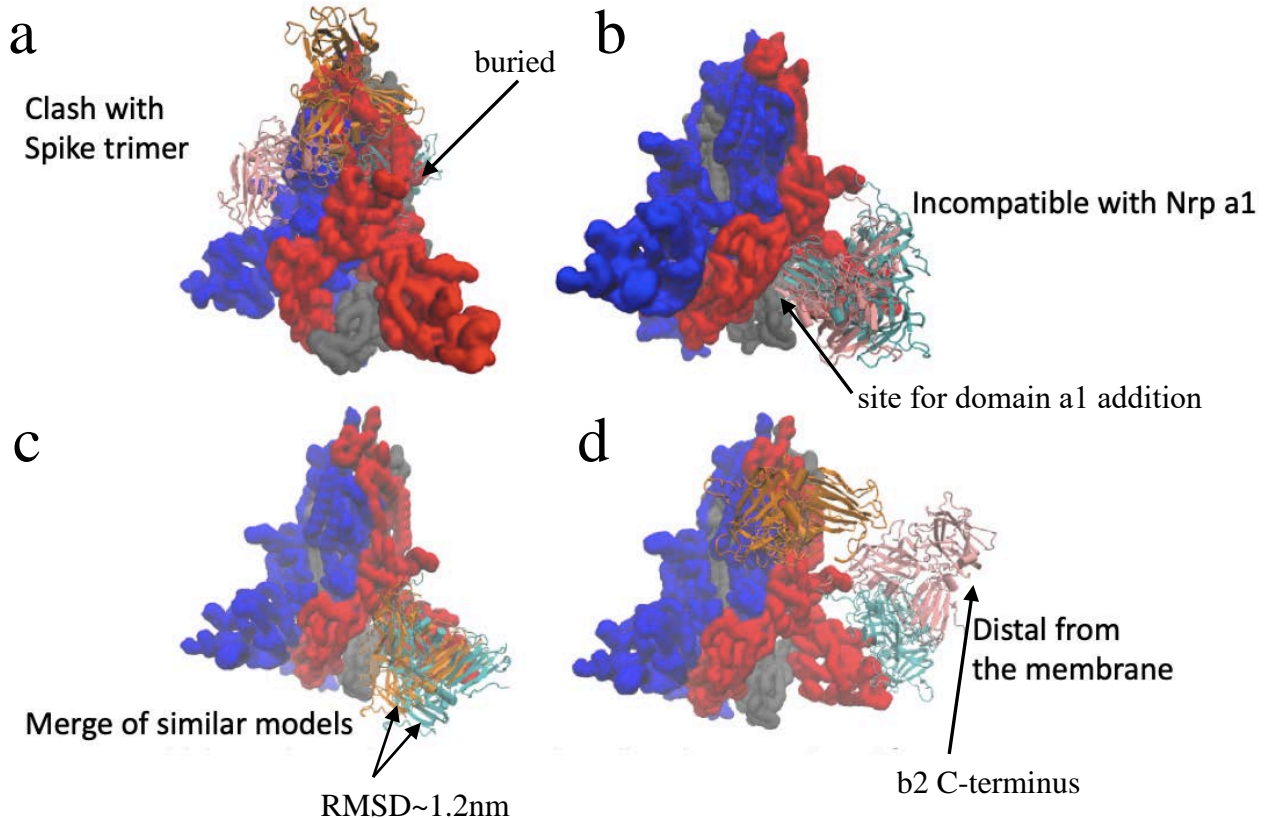

Figure S2: Time evolution of RMSD of the 7 models of Nrp1: Spike complex.

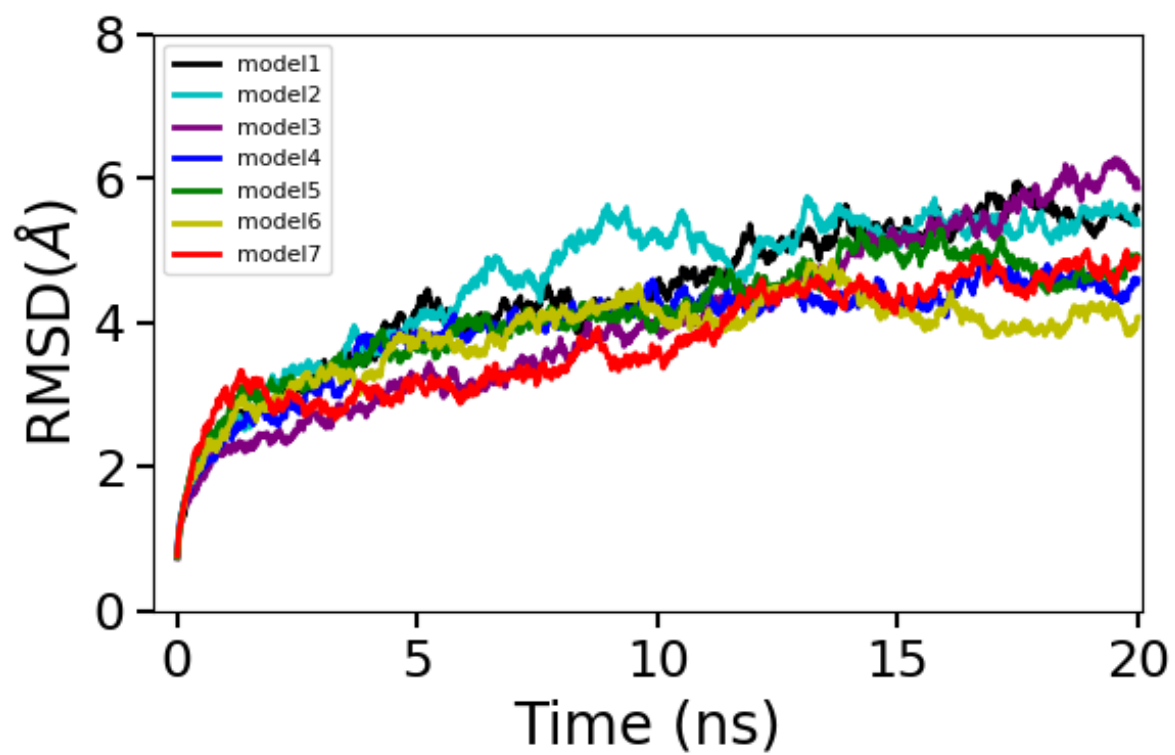

Figure S3: Residues identified as wider interface (> 30% occupancy and less than 0.6 nm distant to the other protein). Typically, a cut-off of 0.4 nm used to judge the interaction between two amino acids (Table in Fig. 2b). In order to include the neighboring residues at the Nrp1: Spike interfaces, we also used a cut-off of 0.6nm, yielding interface residues shown pictorially in aligned sequence segment bars for the two proteins.

Nrp1 domains: a2: res. 27-141, b1: res. 147-265, b2: res. 275-424.

Spike protein S1: N1: res. 1-19, N2: res. 20-38, N3: res. 58-90, N4: res. 210-220, N5: res. 293-318, RBD<sup>N</sup>: res. 318-330, RBD<sup>C</sup>: res. 525-541, C1: res. 602-610, C2: res. 621-626, C3: res. 631-644, C: res. 682-685, S2<sup>N</sup>: res. 689-691

|         | Nrp1 domains | Spike protein S1                                                             |
|---------|--------------|------------------------------------------------------------------------------|
| Model 1 | b1, b2       | N2, C2, C3, C                                                                |
| Model 2 | a2, b1       | N1, N2, N4, C                                                                |
| Model 3 | a2, b1       | N1, N2, N3, N4, RBD <sup>N</sup> , RBD <sup>C</sup> , C2, C, S2 <sup>N</sup> |
| Model 4 | a2, b1, b2   | N1, N2, N3, N4, C3, C                                                        |
| Model 5 | b1           | N3, N4, N5, C1, C, S2 <sup>N</sup>                                           |
| Model 6 | a2, b1       | N2, N3, N4, RBD <sup>C</sup> , C1, C2, C3, C, S2 <sup>N</sup>                |
| Model 7 | b1, b2       | N1, N2, N3, C2, C3, C                                                        |

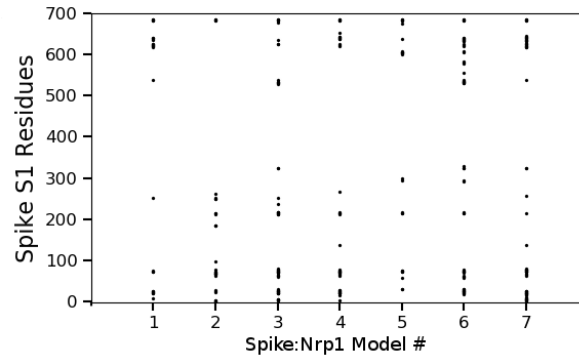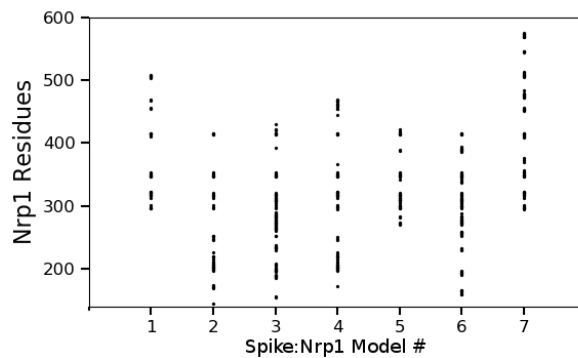

Figure S4: Glycosylation sites (N17, N74, N323, N616, shown as small spheres to Chain C in red) may alter the affinity for Nrp1 binding.

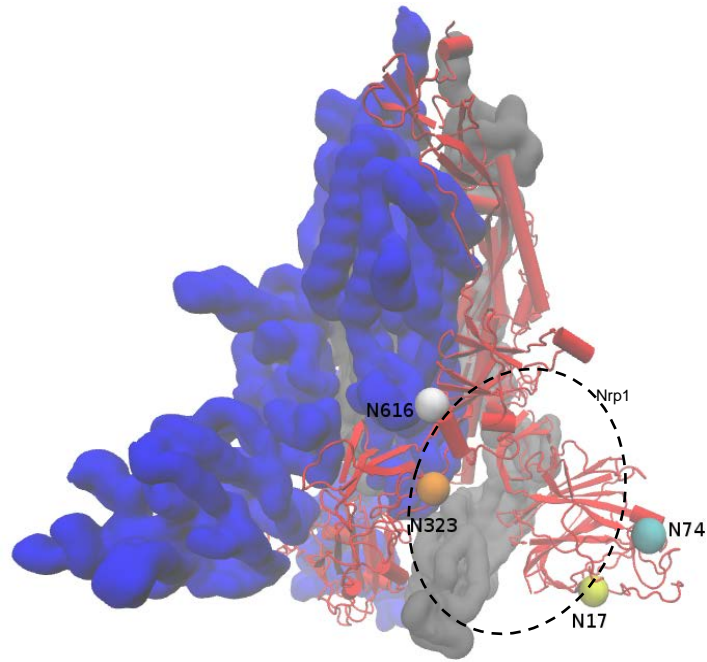

Figure S5: Force-Displacement curves for the simulation of the 7 model structures. Black for ACE2-S1: S2 and red for ACE2-S1-Nrp1: S2 separation.

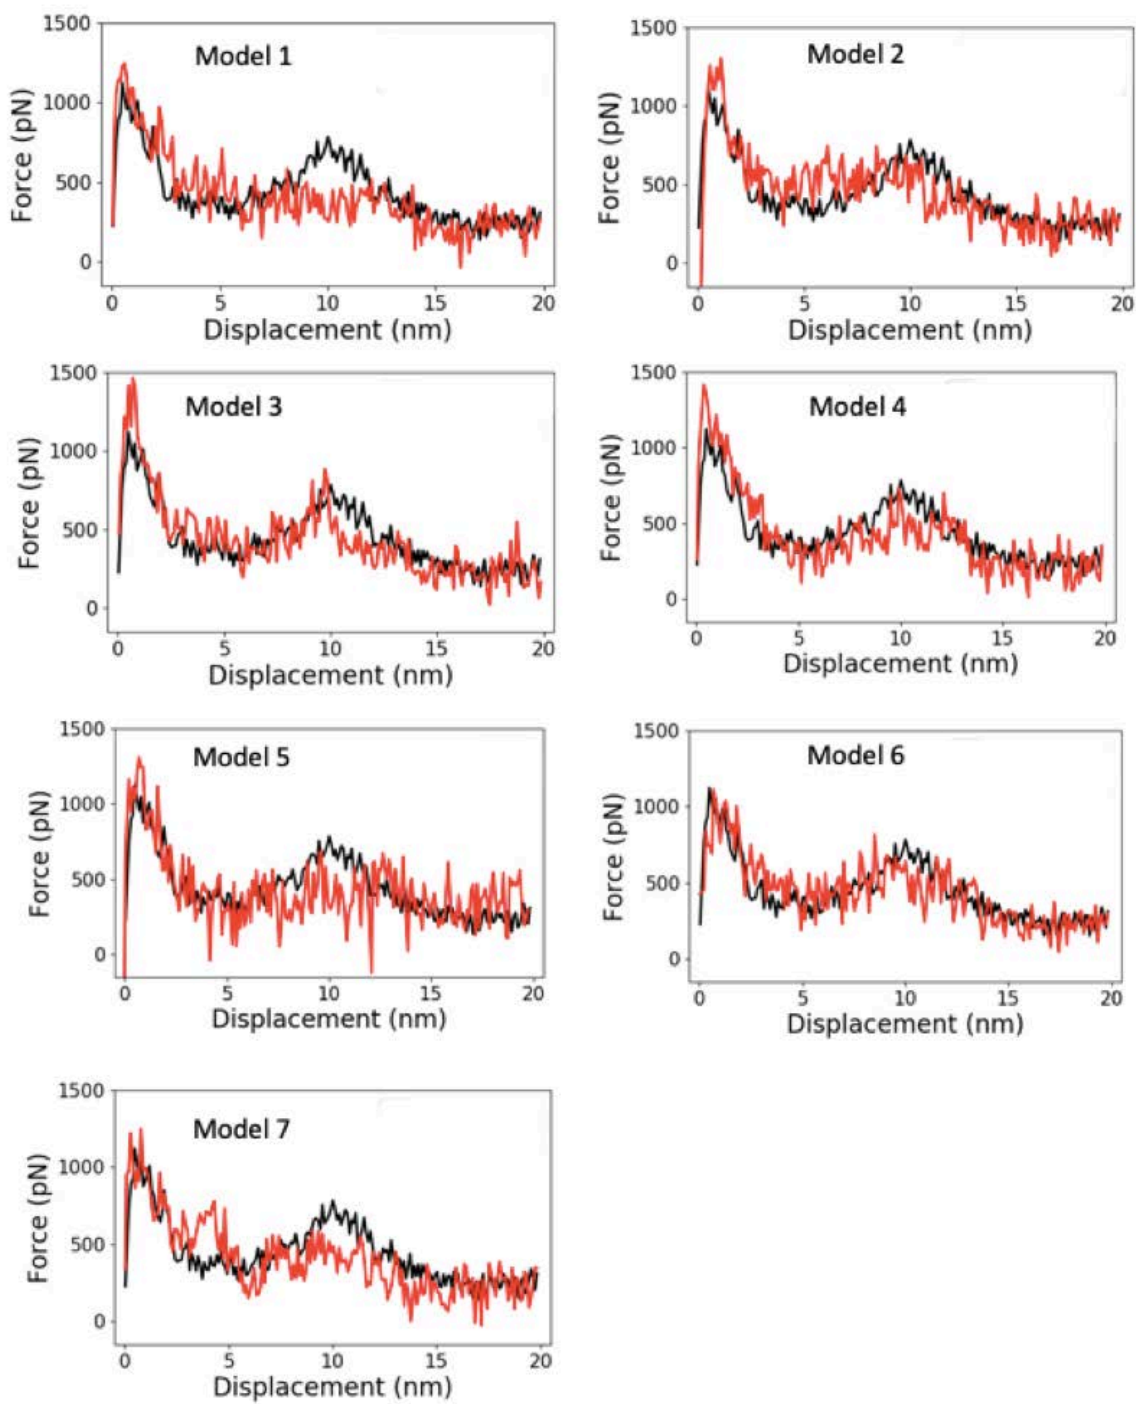

Supplement: mmc1.pdf [file mmc1.pdf]
